# Supplementary material
Source: ML conference proceedings conference paper supplement (https://openreview.net/forum?id=CX4uT5cauk)
Supplement: supplementary_material [file attachment]

## Link to the Prototype

We encourage you to explore our tool, TextVista.

**Link** to TextVista:

<https://witty-meadow-01b0d9610.2.azurestaticapps.net/>

**Password:** GI\_TextVista2024

**Dataset** currently in use: Tweets collected about COVID-19 that may relate to Canada on May 10, 2022.

## Prototype Sketch Designs

Paper prototypes used for the second focus group session:

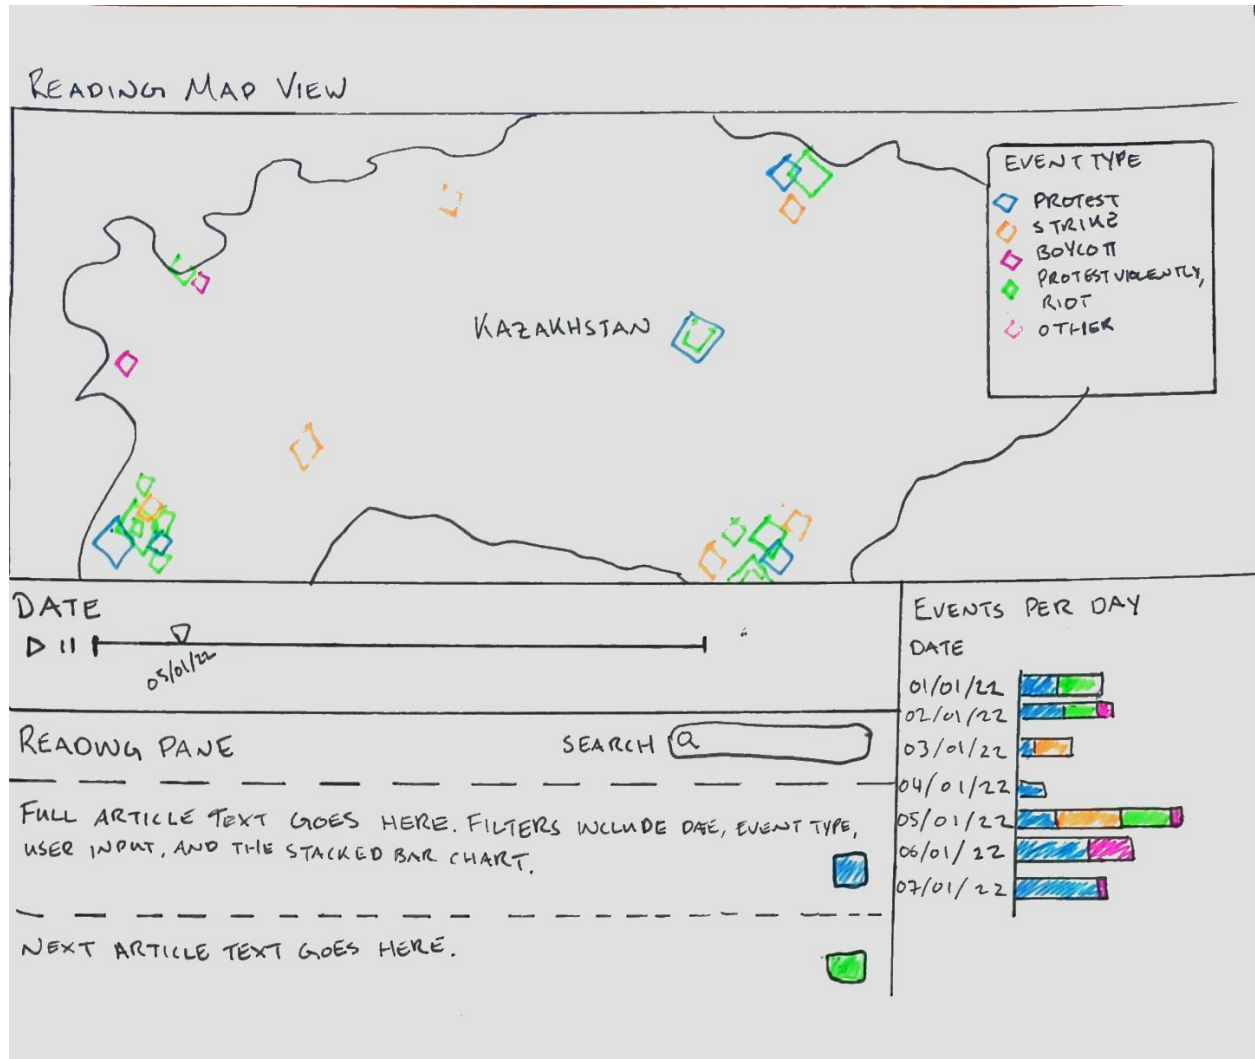

Fig 1. A paper prototype of the Reading Map View that was discarded as not all participants worked with location data.

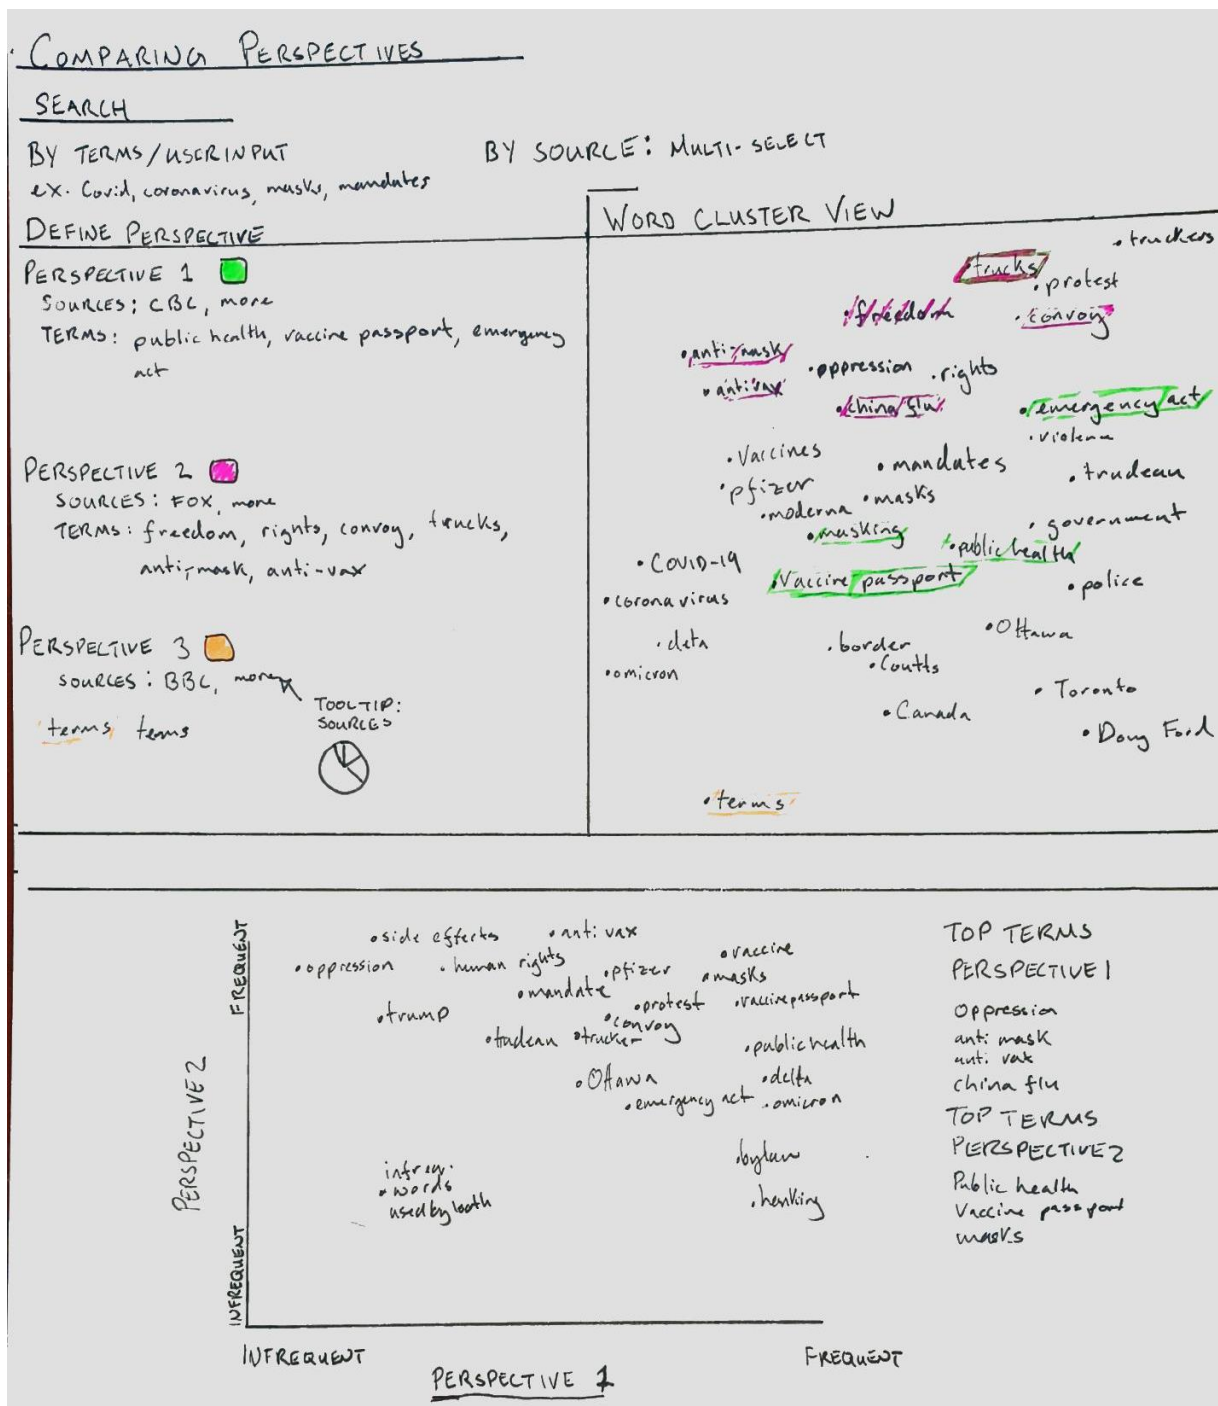

Fig 2. A paper prototype of the Comparing Perspectives View, which became the Sentiment and Semantic Clustering View.

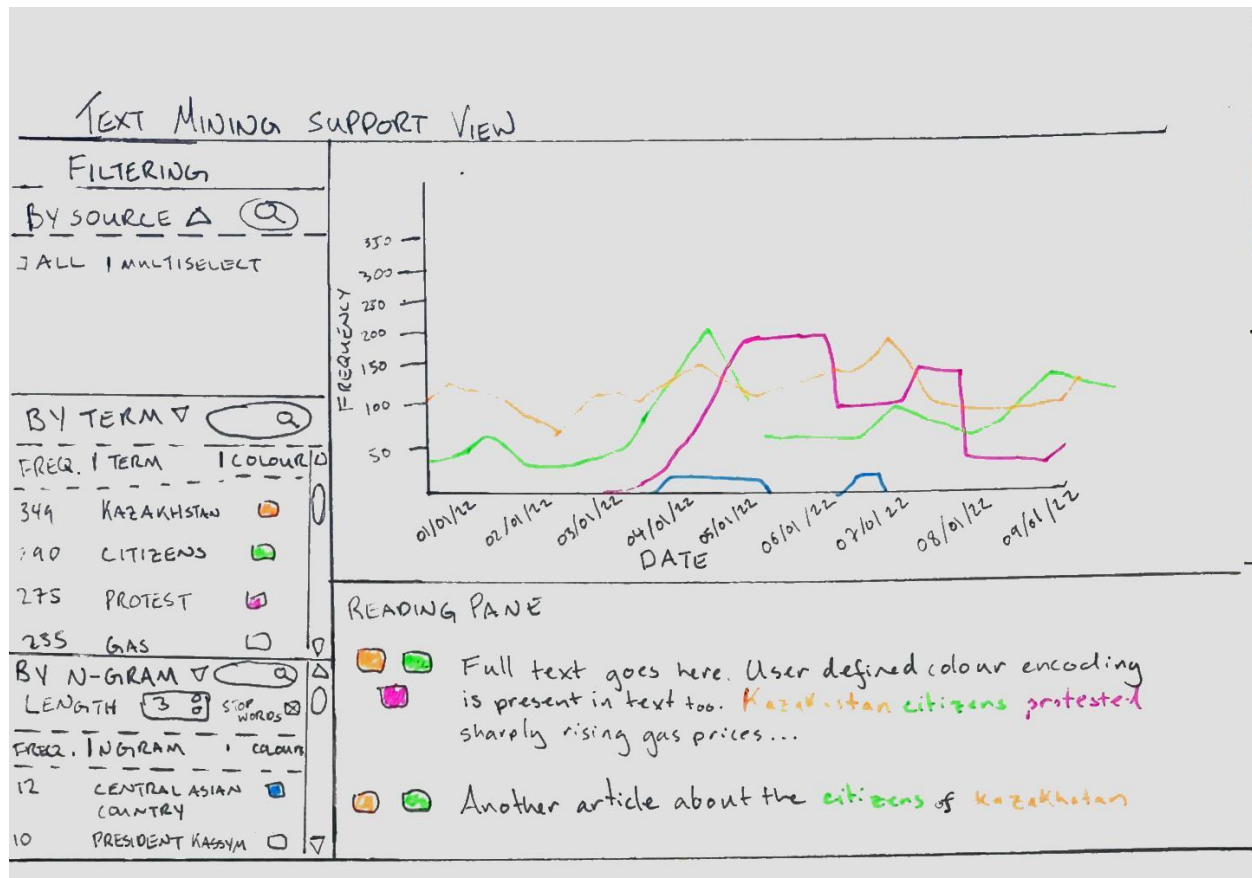

Fig 3. A paper prototype of the Text Mining Support view, which became the Text Frequency View.

# TIME DIAL VIEW · EVENTS, ENTITIES, AND SENTIMENT

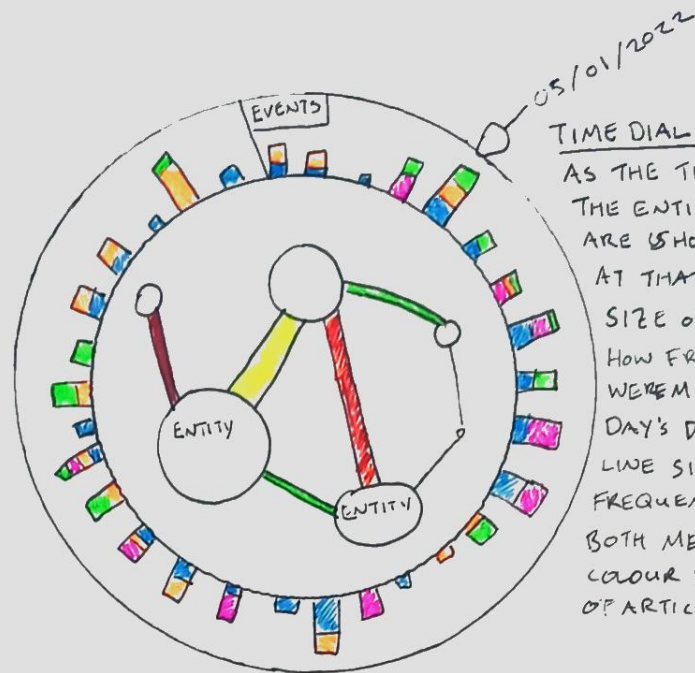

## TIME DIAL

AS THE TIME DIAL IS MOVED, THE ENTITIES & RELATIONSHIPS ARE SHOWN AS THEY ARE AT THAT TIME.

SIZE OF ENTITIES INDICATES HOW FREQUENTLY THEY WERE MENTIONED IN THAT DAY'S DATA. CONNECTING LINE SIZE INDICATES HOW FREQUENTLY THEY WERE BOTH MENTIONED. LINE COLOUR INDICATES SENTIMENT OF ARTICLES.

## READING PANE · 05/01/2022

ENTITIES EVENT TYPE FULL TEXT

|                               |                            |                                                                                          |
|-------------------------------|----------------------------|------------------------------------------------------------------------------------------|
| CIVILIANS<br>POLICE           | PROTEST                    | ARTICLE HEADLINES : BODY GOES HERE. TERMS ASSIGNED COLOURS WILL APPEAR HIGHLIGHTED       |
| PRESIDENT<br>TOKAYEV,<br>CTSO | PROTEST VIOLENTLY,<br>RIOT | TODAY, PRESIDENT TOKAYEV'S MANSION WAS SET ON FIRE AS PROTESTS SPREAD ACROSS KAZAKHSTAN. |
| LABOUR<br>POLICE              | STRIKE.                    |                                                                                          |

## FILTER & SEARCH

BY TERM:   
BY EVENT TYPE:  
BY ENTITIES:

## ASSIGN COLOUR:

EVENT TYPES

- PROTEST
- STRIKE
- BOYCOTT
- PROTEST VIOLENTLY, RIOT

ENTITIES

- PRESIDENT TOKAYEV

TERMS

Fig4. A paper prototype of the Entity Time Dial View.

## Sample Journal Format

Please keep notes on your experiences using TextVista during this user study.

We are particularly interested in the following:

**Insights:** What did you discover about your data through this visualization? How? Please include point form steps on how you reached this insight and what view(s) were used to find this insight.

**Wishlist features:** Is there something you wish TextVista would do? Whether a new feature or a change to an existing feature, please share your ideas.

**Usability issues:** If you encounter a bug, problem, or pain point while using TextVista, please describe it. If it is a bug, please describe the steps you took to trigger the bug if you can.
